# Supplementary material for: Restoration of the healing microenvironment in diabetic wounds with matrix-binding IL-1 receptor antagonist
Source: PubMed Central journal article supplement (PMC7998035; doi:10.1038/s42003-021-01913-9), 2021-03-26
Supplement: 42003_2021_1913_MOESM3_ESM.pdf [file 42003_2021_1913_MOESM3_ESM.pdf]

## Description of Additional Supplementary Files

**File Name:** Supplementary Data 1

**Description:** Source data used to generate the graphs displayed in Figures 1 to 4 and Supplementary Figures 1, 3, 4, 5, 6, 8, and 9.
